# Supplementary material
Source: PubMed Central journal article supplement (PMC6289758)
Supplement: NIHMS991316-supplement-1.pdf [file NIHMS991316-supplement-1.pdf]

# The Role of the Nuclear Factor- $\kappa$ B Transcriptional Complex in Cortical Immune Activation in Schizophrenia

## *Supplemental Information*

### **Supplemental Methods**

#### *Quantitative PCR*

Frozen tissue blocks containing the middle portion of the right superior frontal sulcus were confirmed to contain PFC area 9 using Nissl-stained, cryostat tissue sections for each subject (1, 2). The gray-white matter boundary of PFC area 9 in a tissue block from each subject was carefully scored with a scalpel blade in locations where the gray matter had uniform thickness and the gray-white matter boundary was easily discerned. The scored gray matter region of the tissue block was then digitally photographed, and the number of tissue sections (40  $\mu$ m) required to collect  $\sim 30$  mm<sup>3</sup> of gray matter was determined for each subject. The calculated number of required tissue sections for each subject was then cut by cryostat, and gray matter was separately collected into a tube containing TRIzol reagent in a manner that ensured minimal white matter contamination and excellent RNA preservation (3). Standardized dilutions of total RNA for each subject were used to synthesize cDNA. All primer pairs (Supplemental Table S2) demonstrated high amplification efficiency (>90%) across a wide range of cDNA dilutions and specific single products in dissociation curve analysis. Control studies in which the cDNA template was not included in the quantitative PCR reaction resulted in the absence of amplification.

#### *Poly(I:C)-exposed mice*

As previously described (4), timed pregnant C57BL/6J mice (n=12/condition; The Jackson Laboratory, Bar Harbor, Maine) received intraperitoneal injections of polyriboinosinic-

polyribocytidilic acid potassium salt [poly(I:C); 20 mg/kg pure form; Sigma, St. Louis, Missouri], a synthetic analogue of double stranded RNA that induces an immune response (5-7), or an equivalent volume of normal saline daily for three days at mid- (E11-13) or late- (E15-17) gestation (Supplemental Table S3). Non-pregnant adult female mice also received similar injections of poly(I:C) 20 mg/kg (n=8) or normal saline (n=8) daily for three days in parallel with the timed pregnant mice. The non-pregnant mice were euthanized 3 hours after the last injection (random estrous cycle) and trunk blood was collected after decapitation. A second set of non- pregnant adult female mice also received injections of poly(I:C) (n=4) or normal saline (n=4) daily for three days at a separate time and underwent transcardial perfusion with normal saline 3 hours after the last injection. Serum IL-6 levels were confirmed to be massively elevated in poly(I:C)- exposed mice ( $725.1 \pm 276.6$  pg/ml;  $t_{14}=7.3$ ,  $p<.0001$ ) relative to normal saline-exposed mice ( $8.6 \pm 14.3$  pg/ml) using the Mouse IL-6 Quantikine ELISA Immunoassay (R&D Systems, Minneapolis, Minnesota) as previously reported (4).

Fresh, frozen brains from one 8-week-old male and/or female offspring per poly(I:C)-injected mother (n=7-8/sex/condition; Supplemental Table S3) and from the non-pregnant adult female mice that received daily poly(I:C) or normal saline injections for three days were included in the study. RNA was isolated from homogenates of frontal cortex tissue sections (12  $\mu$ m) collected consecutively from Bregma +2.8 to 2.1 mm (excluding sub-rhinal fissure olfactory tissue; (8)) into TRIzol. Quantitative PCR assessment of NF- $\kappa$ B-related markers (Supplemental Table S2) was performed as described for the human studies with the following exception: primer efficiency testing found that transcript levels for TLR4, TNFR2, CD40, and I $\kappa$ B $\epsilon$  in mouse frontal cortex were insufficient for analysis by quantitative PCR.

All animal studies followed the NIH Guide for the Care and Use of Laboratory Animals

and were approved by the University of Pittsburgh's Institutional Animal Care and Use Committee.

### Supplemental References

1. Volk DW, Austin MC, Pierri JN, Sampson AR, Lewis DA (2000): Decreased glutamic acid decarboxylase67 messenger RNA expression in a subset of prefrontal cortical gamma-aminobutyric acid neurons in subjects with schizophrenia. *Arch Gen Psychiatry*. 57:237-245.
2. Volk DW, Sampson AR, Zhang Y, Edelson JR, Lewis DA (2016): Cortical GABA markers identify a molecular subtype of psychotic and bipolar disorders. *Psychol Med*. 46:2501-2512.
3. Volk DW, Siegel BI, Verrico CD, Lewis DA (2013): Endocannabinoid metabolism in the prefrontal cortex in schizophrenia. *Schizophr Res*. 147:53-57.
4. Volk DW, Chitrapu A, Edelson JR, Roman KM, Moroco AE, Lewis DA (2015): Molecular mechanisms and timing of cortical immune activation in schizophrenia. *Am J Psychiatry*. 172:1112-1121.
5. Garay PA, Hsiao EY, Patterson PH, McAllister AK (2013): Maternal immune activation causes age- and region-specific changes in brain cytokines in offspring throughout development. *Brain Behav Immun*. 31:54-68.
6. Smith SE, Li J, Garbett K, Mirnics K, Patterson PH (2007): Maternal immune activation alters fetal brain development through interleukin-6. *J Neurosci*. 27:10695-10702.
7. Hsiao EY, Patterson PH (2011): Activation of the maternal immune system induces endocrine changes in the placenta via IL-6. *Brain Behav Immun*. 25:604-615.
8. Paxinos G, Franklin K (2001): The mouse brain in stereotaxic coordinates. San Diego: Academic Press.

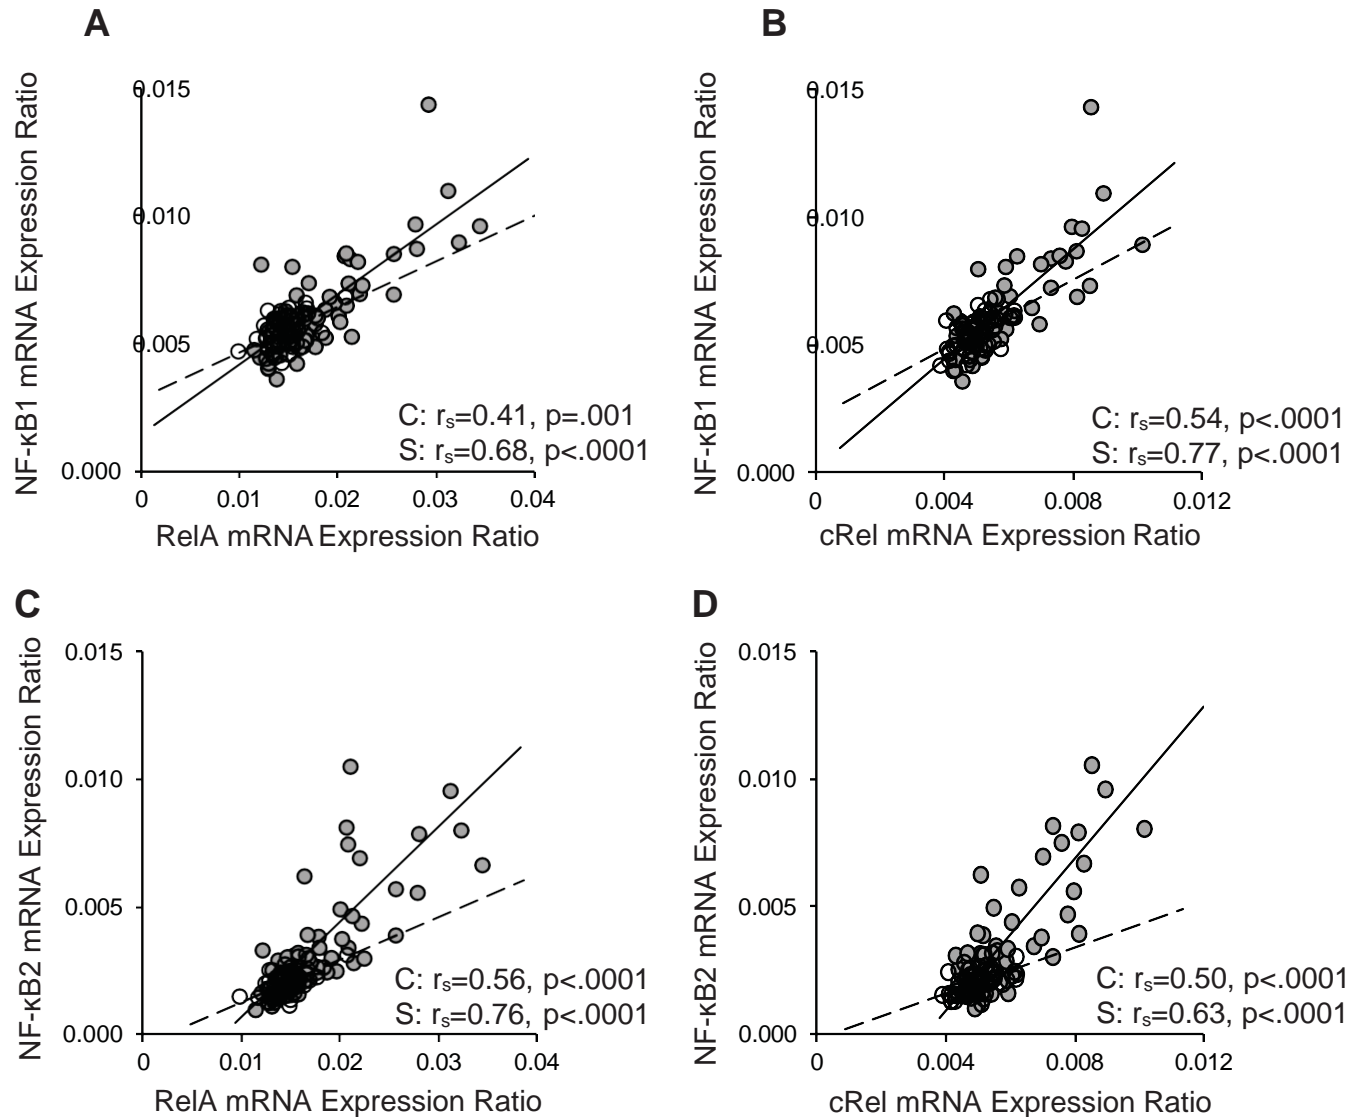

**Supplemental Figure S1. Correlations between transcript levels for NF- $\kappa$ B family members in the prefrontal cortex of unaffected comparison subjects and schizophrenia subjects.** NF- $\kappa$ B1 and NF- $\kappa$ B2 mRNA levels were positively correlated with mRNA levels for RelA (**A**, **C**, respectively) and cRel (**B**, **D**, respectively) in both schizophrenia subjects (S; grey circles; solid line) and unaffected comparison subjects (C; open circles; dashed line).

**Figure S2. NF- $\kappa$ B-Related mRNAs in Saline-Perfused Mice with Subacute Exposure to Poly(I:C) in Adulthood**

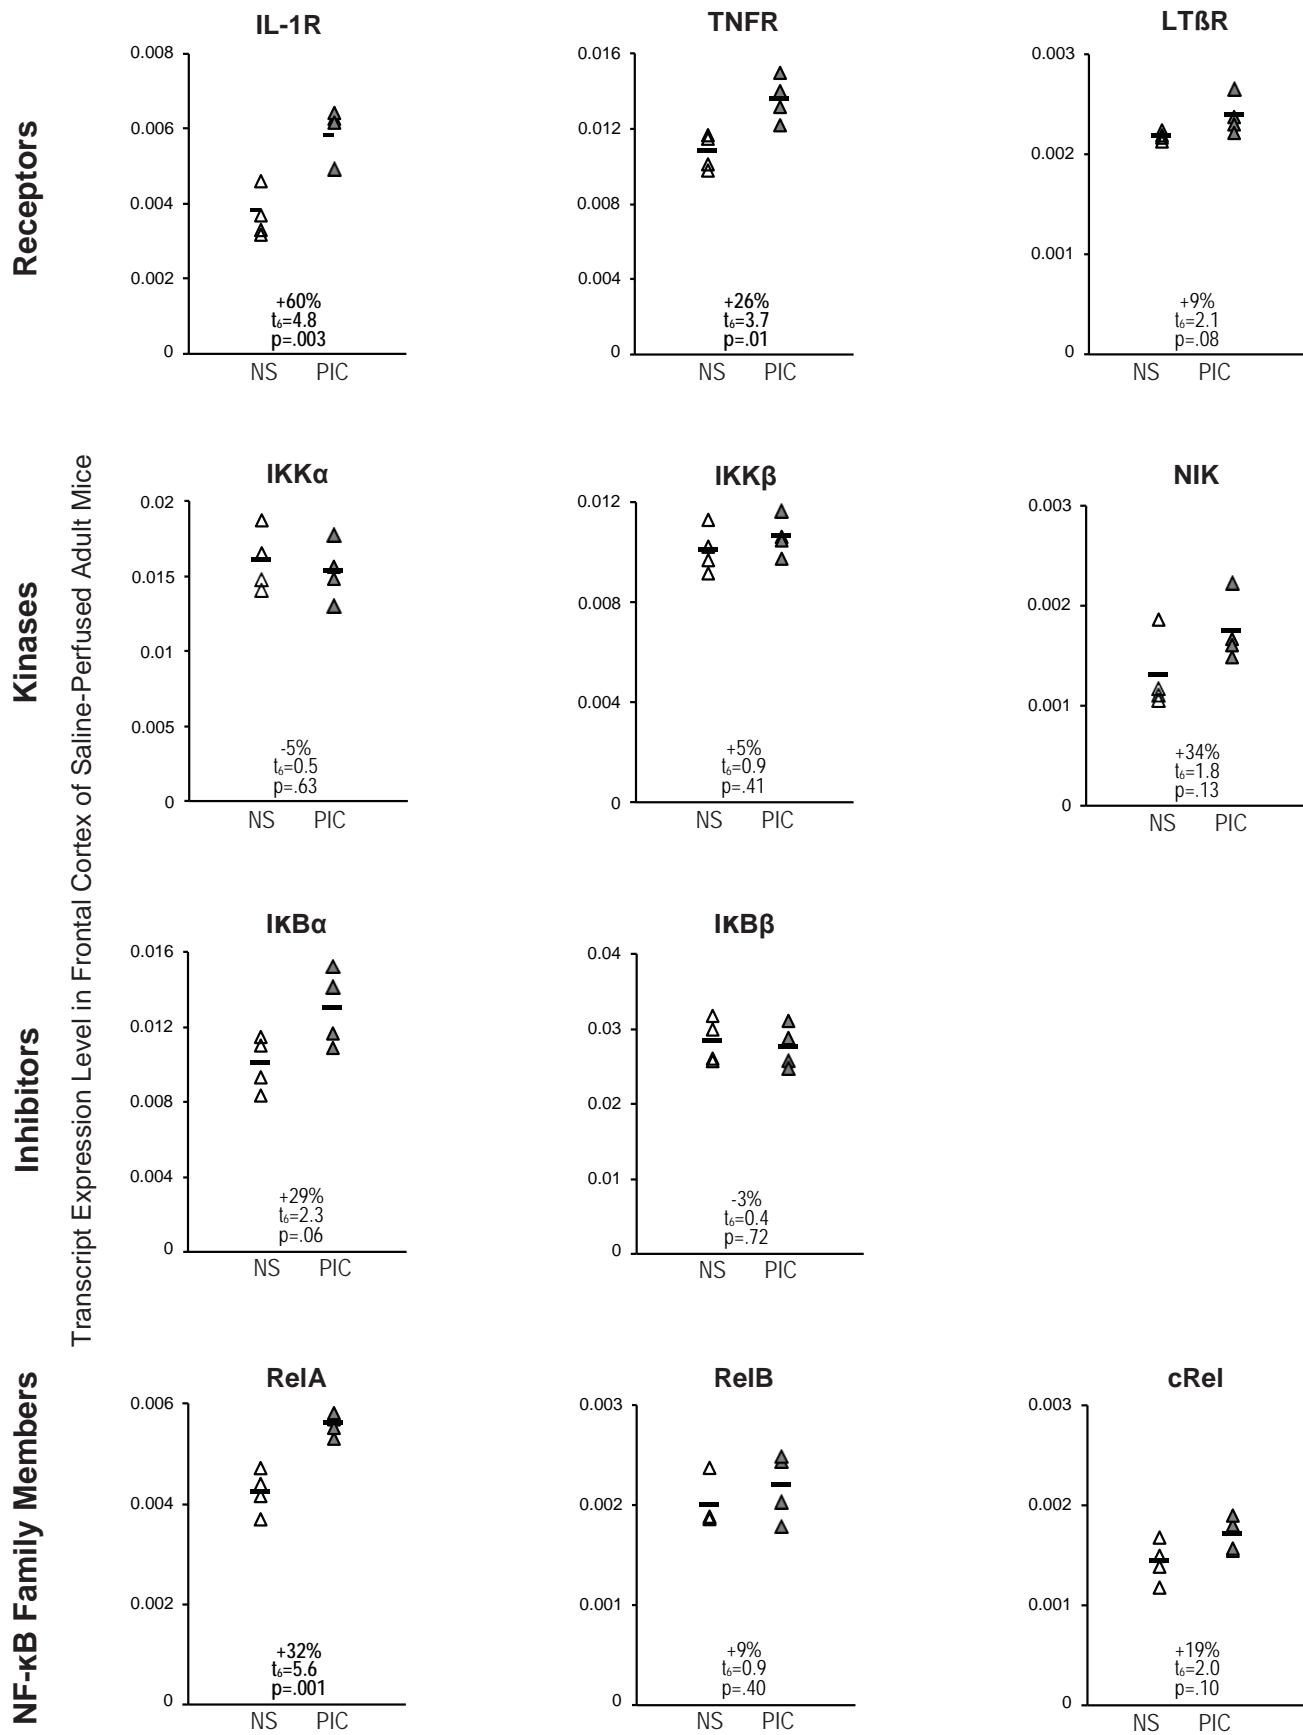

Exposure to Normal Saline (NS) or Poly(I:C) (PIC) in Adulthood

**Supplemental Figure S2. Transcript levels for NF- $\kappa$ B-related mRNAs in the frontal cortex of adult mice exposed to poly(I:C), then saline-perfused.** To examine whether residual blood cells in brain parenchyma may have contributed to the effects of subacute poly(I:C) exposure on NF- $\kappa$ B-related mRNAs in the frontal cortex, an additional group of adult non-pregnant female mice was exposed to poly(I:C) (n=4; gray triangles) or normal saline (n=4; open triangles) daily for three days then underwent transcatheterial perfusion with normal saline. Transcript levels for NF- $\kappa$ B family members, activation receptors, kinases, and inhibitors were then quantified in the frontal cortex. Black bars indicate mean mRNA levels for each condition. The pattern of altered NF- $\kappa$ B-related mRNA levels seen in the saline-perfused mice with daily poly(I:C) exposure was highly similar to that seen in mice that were not saline-perfused (Figure 4). For example, transcript levels were also significantly higher for IL-1R, TNFR, and RelA in the frontal cortex of poly(I:C)-exposed mice that underwent transcatheterial perfusion relative to normal saline-exposed mice that also underwent transcatheterial perfusion. I $\kappa$ B $\alpha$  mRNA levels were also higher in the poly(I:C)-exposed mice; however, this difference did not quite achieve statistical significance (p=.06). Transcript levels for LT $\beta$ R, IKK $\alpha$ , IKK $\beta$ , NIK, I $\kappa$ B $\beta$ , and cRel were similarly unchanged in poly(I:C)-exposed mice relative to normal saline-exposed mice. These findings suggest that any residual blood cells in brain parenchyma likely do not explain the effects of subacute poly(I:C) exposure on NF- $\kappa$ B-related mRNAs in the frontal cortex.

**Table S1. Demographic, postmortem, and clinical characteristics of human subjects used in this study.**

| Unaffected Comparison Subjects |       |              |     |                  |                              |     |     |                              | Subjects with Schizophrenia |                                                  |              |     |                  |                              |     |     |                                     |               |                 |                            |                             |                                           |                                 |
|--------------------------------|-------|--------------|-----|------------------|------------------------------|-----|-----|------------------------------|-----------------------------|--------------------------------------------------|--------------|-----|------------------|------------------------------|-----|-----|-------------------------------------|---------------|-----------------|----------------------------|-----------------------------|-------------------------------------------|---------------------------------|
| Pair                           | Case  | Sex/<br>Race | Age | PMI <sup>a</sup> | Storage<br>Time <sup>b</sup> | RIN | pH  | Cause of Death               | Case                        | DSM IV diagnosis                                 | Sex/<br>Race | Age | PMI <sup>a</sup> | Storage<br>Time <sup>b</sup> | RIN | pH  | Cause of Death                      | NSAID<br>ATOD | Tobacco<br>ATOD | Anti-<br>psychotic<br>ATOD | Anti-<br>depressant<br>ATOD | Benzodiazepine/<br>Anticonvulsant<br>ATOD | Living<br>Independently<br>ATOD |
| 1                              | 592   | M/B          | 41  | 22.1             | 225                          | 9.0 | 6.7 | ASCVD                        | 533                         | Chronic undifferentiated schizophrenia           | M/W          | 40  | 29.1             | 235                          | 8.4 | 6.8 | Accidental Asphyxiation             | No            | Unknown         | Typical                    | No                          | No                                        | No                              |
| 2                              | 567   | F/W          | 46  | 15.0             | 229                          | 8.9 | 6.7 | Mitral valve prolapse        | 537                         | Schizoaffective disorder                         | F/W          | 37  | 14.5             | 234                          | 8.6 | 6.7 | Suicide by hanging                  | No            | Unknown         | None                       | No                          | No                                        | Yes                             |
| 3                              | 516   | M/B          | 20  | 14.0             | 237                          | 8.4 | 6.9 | Homicide by gun shot         | 547                         | Schizoaffective disorder                         | M/B          | 27  | 16.5             | 233                          | 7.4 | 7.0 | Heat Stroke                         | No            | Unknown         | Typical                    | Yes                         | Yes                                       | No                              |
| 4                              | 630   | M/W          | 65  | 21.2             | 219                          | 9.0 | 7.0 | ASCVD                        | 566                         | Chronic undifferentiated schizophrenia; AAR      | M/W          | 63  | 18.3             | 230                          | 8.0 | 6.8 | ASCVD                               | No            | Yes             | Atypical                   | Yes                         | Yes                                       | No                              |
| 5                              | 604   | M/W          | 39  | 19.3             | 223                          | 8.6 | 7.1 | Hypoplastic coronary artery  | 581                         | Chronic paranoid schizophrenia; ADC; OAC         | M/W          | 46  | 28.1             | 227                          | 7.9 | 7.2 | Accidental combined drug overdose   | No            | Unknown         | Typical                    | No                          | Yes                                       | Yes                             |
| 6                              | 546   | F/W          | 37  | 23.5             | 233                          | 8.6 | 6.7 | ASCVD                        | 587                         | Chronic undifferentiated schizophrenia; AAR      | F/B          | 38  | 17.8             | 226                          | 9.0 | 7.0 | Myocardial hypertrophy              | No            | Yes             | Atypical                   | No                          | Yes                                       | No                              |
| 7                              | 551   | M/W          | 61  | 16.4             | 232                          | 8.3 | 6.6 | Cardiac tamponade            | 625                         | Chronic disorganized schizophrenia; AAC          | M/B          | 49  | 23.5             | 220                          | 7.6 | 7.3 | ASCVD                               | No            | Yes             | Typical                    | Yes                         | No                                        | No                              |
| 8                              | 685   | M/W          | 56  | 14.5             | 212                          | 8.1 | 6.6 | Hypoplastic coronary artery  | 622                         | Chronic undifferentiated schizophrenia           | M/W          | 58  | 18.9             | 220                          | 7.4 | 6.8 | Right MCA infarction                | No            | Unknown         | None                       | No                          | No                                        | No                              |
| 9                              | 681   | M/W          | 51  | 11.6             | 213                          | 8.9 | 7.2 | Hypertrophic cardio-myopathy | 640                         | Chronic paranoid schizophrenia                   | M/W          | 49  | 5.2              | 218                          | 8.4 | 6.9 | Pulmonary embolism                  | No            | Unknown         | Atypical                   | Yes                         | No                                        | No                              |
| 10                             | 806   | M/W          | 57  | 24.0             | 191                          | 7.8 | 6.9 | Pulmonary embolism           | 665                         | Chronic paranoid schizophrenia; ADC              | M/B          | 59  | 28.1             | 216                          | 9.2 | 6.9 | Intestinal hemorrhage               | No            | Yes             | Typical                    | Yes                         | No                                        | Yes                             |
| 11                             | 822   | M/B          | 28  | 25.3             | 189                          | 8.5 | 7.0 | ASCVD                        | 787                         | Schizoaffective disorder; ODC                    | M/B          | 27  | 19.2             | 195                          | 8.4 | 6.7 | Suicide by gun shot                 | No            | No              | Typical                    | No                          | No                                        | No                              |
| 12                             | 727   | M/B          | 19  | 7.0              | 206                          | 9.2 | 7.2 | Trauma                       | 829                         | Schizoaffective disorder; ADC; OAR               | M/W          | 25  | 5.0              | 187                          | 9.3 | 6.8 | Suicide by salicylate overdose      | Yes           | Yes             | None                       | No                          | Yes                                       | No                              |
| 13                             | 871   | M/W          | 28  | 16.5             | 178                          | 8.5 | 7.1 | Trauma                       | 878                         | Disorganized schizophrenia; ADC                  | M/W          | 33  | 10.8             | 177                          | 8.9 | 6.7 | Myocardial fibrosis                 | No            | Yes             | Both                       | Yes                         | Yes                                       | No                              |
| 14                             | 575   | F/B          | 55  | 11.3             | 228                          | 9.6 | 6.8 | ASCVD                        | 517                         | Disorganized schizophrenia; ADC                  | F/W          | 48  | 3.7              | 237                          | 9.3 | 6.7 | Intracerebral hemorrhage            | No            | Yes             | Atypical                   | No                          | No                                        | No                              |
| 15                             | 700   | M/W          | 42  | 26.1             | 210                          | 8.7 | 7.0 | ASCVD                        | 539                         | Schizoaffective disorder; ADR                    | M/W          | 50  | 40.5             | 234                          | 8.1 | 7.1 | Suicide by combined drug overdose   | Yes           | Unknown         | Atypical                   | Yes                         | Yes                                       | Yes                             |
| 16                             | 988   | M/W          | 82  | 22.5             | 157                          | 8.4 | 6.2 | Trauma                       | 621                         | Chronic undifferentiated schizophrenia           | M/W          | 83  | 16.0             | 220                          | 8.7 | 7.3 | Accidental asphyxiation             | No            | Unknown         | None                       | No                          | No                                        | No                              |
| 17                             | 686   | F/W          | 52  | 22.6             | 212                          | 8.5 | 7.0 | ASCVD                        | 656                         | Schizoaffective disorder; ADC                    | F/B          | 47  | 20.1             | 216                          | 9.2 | 7.3 | Suicide by gun shot                 | Yes           | Yes             | Atypical                   | No                          | No                                        | Yes                             |
| 18                             | 634   | M/W          | 52  | 16.2             | 219                          | 8.5 | 7.0 | ASCVD                        | 722                         | Chronic undifferentiated schizophrenia; ODR; OAR | M/B          | 45  | 9.1              | 206                          | 9.2 | 6.7 | Upper GI bleeding                   | No            | Yes             | Typical                    | No                          | No                                        | No                              |
| 19                             | 852   | M/W          | 54  | 8.0              | 181                          | 9.1 | 6.8 | Cardiac tamponade            | 781                         | Schizoaffective disorder; ADR                    | M/B          | 52  | 8.0              | 196                          | 7.7 | 6.7 | Peritonitis                         | No            | Yes             | Typical                    | Yes                         | No                                        | No                              |
| 20                             | 987   | F/W          | 65  | 21.5             | 157                          | 9.1 | 6.8 | ASCVD                        | 802                         | Schizoaffective disorder; ADC; ODR               | F/W          | 63  | 29.0             | 192                          | 9.2 | 6.4 | Right ventricular dysplasia         | No            | Yes             | Both                       | No                          | Yes                                       | Yes                             |
| 21                             | 818   | F/W          | 67  | 24.0             | 190                          | 8.4 | 7.1 | Anaphylactic reaction        | 917                         | Chronic undifferentiated schizophrenia           | F/W          | 71  | 23.8             | 170                          | 7.0 | 6.8 | ASCVD                               | No            | Yes             | Typical                    | No                          | No                                        | No                              |
| 22                             | 857   | M/W          | 48  | 16.6             | 180                          | 8.9 | 6.7 | ASCVD                        | 930                         | Disorganized schizophrenia; ADR; OAR             | M/W          | 47  | 15.3             | 167                          | 8.2 | 6.2 | ASCVD                               | No            | Yes             | None                       | No                          | Yes                                       | No                              |
| 23                             | 739   | M/W          | 40  | 15.8             | 205                          | 8.4 | 6.9 | ASCVD                        | 933                         | Disorganized schizophrenia                       | M/W          | 44  | 8.3              | 166                          | 8.1 | 5.9 | Myocarditis                         | No            | No              | Atypical                   | Yes                         | Yes                                       | No                              |
| 24                             | 1047  | M/W          | 43  | 13.8             | 148                          | 9.0 | 6.6 | ASCVD                        | 1209                        | Schizoaffective disorder                         | M/W          | 35  | 9.1              | 129                          | 8.7 | 6.5 | Suicide by diphenhydramine overdose | Yes           | No              | Atypical                   | No                          | No                                        | Yes                             |
| 25                             | 1086  | M/W          | 51  | 24.2             | 142                          | 8.1 | 6.8 | ASCVD                        | 10025                       | Disorganized schizophrenia; OAR                  | M/B          | 52  | 27.1             | 121                          | 7.8 | 6.7 | ASCVD                               | No            | Yes             | None                       | No                          | No                                        | No                              |
| 26                             | 1092  | F/B          | 40  | 16.6             | 141                          | 8.0 | 6.8 | Mitral valve prolapse        | 1178                        | Schizoaffective disorder                         | F/B          | 37  | 18.9             | 133                          | 8.4 | 6.1 | Pulmonary embolism                  | No            | Yes             | Atypical                   | No                          | Yes                                       | No                              |
| 27                             | 10005 | M/W          | 42  | 23.5             | 129                          | 7.4 | 6.7 | Trauma                       | 1256                        | Undifferentiated schizophrenia                   | M/W          | 34  | 27.4             | 121                          | 7.9 | 6.4 | Suicide by hanging                  | No            | No              | Atypical                   | No                          | No                                        | No                              |
| 28                             | 1336  | M/W          | 65  | 18.4             | 106                          | 8.0 | 6.8 | Cardiac tamponade            | 1173                        | Disorganized schizophrenia; ADR                  | M/W          | 62  | 22.9             | 133                          | 7.7 | 6.4 | ASCVD                               | No            | Yes             | Atypical                   | No                          | No                                        | Yes                             |
| 29                             | 1122  | M/W          | 55  | 15.4             | 138                          | 7.9 | 6.7 | Cardiac tamponade            | 1105                        | Schizoaffective disorder                         | M/W          | 53  | 7.9              | 140                          | 8.9 | 6.2 | ASCVD                               | No            | Yes             | Atypical                   | No                          | No                                        | No                              |

| Unaffected Comparison Subjects |       |              |     |                  |                              |     |     |                         | Subjects with Schizophrenia |                                          |              |     |                  |                              |     |     |                                   |               |                 |                            |                             |                                           |                                 |
|--------------------------------|-------|--------------|-----|------------------|------------------------------|-----|-----|-------------------------|-----------------------------|------------------------------------------|--------------|-----|------------------|------------------------------|-----|-----|-----------------------------------|---------------|-----------------|----------------------------|-----------------------------|-------------------------------------------|---------------------------------|
| Pair                           | Case  | Sex/<br>Race | Age | PMI <sup>a</sup> | Storage<br>Time <sup>b</sup> | RIN | pH  | Cause of Death          | Case                        | DSM IV diagnosis                         | Sex/<br>Race | Age | PMI <sup>a</sup> | Storage<br>Time <sup>b</sup> | RIN | pH  | Cause of Death                    | NSAID<br>ATOD | Tobacco<br>ATOD | Anti-<br>psychotic<br>ATOD | Anti-<br>depressant<br>ATOD | Benzodiazepine/<br>Anticonvulsant<br>ATOD | Living<br>Independently<br>ATOD |
| 30                             | 1284  | M/W          | 55  | 6.4              | 117                          | 8.7 | 6.8 | ASCVD                   | 1188                        | Undifferentiated schizophrenia; AAR; OAR | M/W          | 58  | 7.7              | 131                          | 8.4 | 6.2 | ASCVD                             | No            | Yes             | Atypical                   | No                          | No                                        | No                              |
| 31                             | 1191  | M/B          | 59  | 19.4             | 131                          | 8.4 | 6.2 | ASCVD                   | 1263                        | Undifferentiated schizophrenia; ADR      | M/W          | 62  | 22.7             | 120                          | 8.5 | 7.1 | Accidental asphyxiation           | Yes           | Yes             | Both                       | Yes                         | No                                        | No                              |
| 32                             | 970   | M/W          | 42  | 25.9             | 159                          | 7.2 | 6.4 | ASCVD                   | 1222                        | Undifferentiated schizophrenia; AAC      | M/W          | 32  | 30.8             | 126                          | 7.5 | 6.4 | Suicide by combined drug overdose | No            | No              | Atypical                   | Yes                         | No                                        | Yes                             |
| 33                             | 10003 | M/W          | 49  | 21.2             | 130                          | 8.4 | 6.5 | Trauma                  | 1088                        | Undifferentiated schizophrenia; ADC; OAC | M/W          | 49  | 21.5             | 142                          | 8.1 | 6.5 | Accidental combined drug overdose | No            | Yes             | Unknown                    | Yes                         | No                                        | No                              |
| 34                             | 1247  | F/W          | 58  | 22.7             | 122                          | 8.4 | 6.4 | ASCVD                   | 1240                        | Undifferentiated schizophrenia; ADR      | F/B          | 50  | 22.9             | 123                          | 7.7 | 6.3 | ASCVD                             | Yes           | Yes             | Atypical                   | No                          | No                                        | No                              |
| 35                             | 1324  | M/W          | 43  | 22.3             | 109                          | 7.3 | 7   | Aortic dissection       | 10020                       | Schizophrenia, paranoid type; AAC; OAC   | M/W          | 38  | 28.8             | 123                          | 7.4 | 6.6 | Suicide by salicylate overdose    | Yes           | Yes             | Atypical                   | Yes                         | Yes                                       | No                              |
| 36                             | 1099  | F/W          | 24  | 9.1              | 140                          | 8.6 | 6.5 | Cardiomyopathy          | 10023                       | Disorganized schizophrenia               | F/B          | 25  | 20.1             | 122                          | 7.4 | 6.7 | Suicide by drowning               | No            | No              | Atypical                   | No                          | Yes                                       | Yes                             |
| 37                             | 1307  | M/B          | 32  | 4.8              | 112                          | 7.6 | 6.7 | ASCVD                   | 10024                       | Paranoid schizophrenia                   | M/B          | 37  | 6.0              | 121                          | 7.5 | 6.1 | ASCVD                             | Yes           | No              | None                       | No                          | No                                        | No                              |
| 38                             | 1391  | F/W          | 51  | 7.8              | 98                           | 7.1 | 6.6 | ASCVD                   | 1189                        | Schizoaffective disorder; AAR            | F/W          | 47  | 14.4             | 131                          | 8.3 | 6.4 | Suicide by combined drug overdose | Yes           | Yes             | Atypical                   | Yes                         | Yes                                       | Yes                             |
| 39                             | 1282  | F/W          | 39  | 24.5             | 117                          | 7.5 | 6.8 | ASCVD                   | 1211                        | Schizoaffective disorder                 | F/W          | 41  | 20.1             | 129                          | 7.8 | 6.3 | Sudden unexplained death          | Yes           | Yes             | Both                       | Yes                         | No                                        | No                              |
| 40                             | 1159  | M/W          | 51  | 16.7             | 134                          | 7.6 | 6.5 | ASCVD                   | 1296                        | Undifferentiated schizophrenia           | M/W          | 48  | 7.8              | 115                          | 7.3 | 6.5 | Pneumonia                         | No            | Yes             | Both                       | Yes                         | No                                        | No                              |
| 41                             | 1326  | M/W          | 58  | 16.4             | 109                          | 8.0 | 6.7 | ASCVD                   | 1314                        | Undifferentiated schizophrenia           | M/W          | 50  | 11.0             | 111                          | 7.2 | 6.2 | ASCVD                             | Yes           | No              | Typical                    | Yes                         | No                                        | No                              |
| 42                             | 902   | M/W          | 60  | 23.6             | 174                          | 7.7 | 6.7 | ASCVD                   | 1361                        | Schizoaffective disorder; ODC            | M/W          | 63  | 23.2             | 104                          | 7.7 | 6.4 | Cardiomyopathy                    | No            | Yes             | Atypical                   | No                          | Yes                                       | No                              |
| 43                             | 1374  | M/W          | 43  | 21.7             | 102                          | 7.2 | 6.6 | ASCVD                   | 904                         | Schizoaffective disorder                 | M/W          | 33  | 28.0             | 174                          | 7.1 | 6.2 | Pneumonia                         | No            | Yes             | Atypical                   | No                          | Yes                                       | No                              |
| 44                             | 1555  | M/W          | 17  | 15.1             | 67                           | 7.9 | 6.9 | Trauma                  | 1649                        | Undifferentiated schizophrenia           | M/B          | 17  | 21.4             | 52                           | 8.1 | 6.9 | Suicide by hanging                | No            | No              | Atypical                   | Yes                         | No                                        | No                              |
| 45                             | 1268  | M/B          | 49  | 19.9             | 119                          | 7.9 | 7.1 | ASCVD                   | 1230                        | Undifferentiated schizophrenia           | M/W          | 50  | 16.9             | 125                          | 8.2 | 6.6 | Suicide by doxepin overdose       | No            | Yes             | Typical                    | Yes                         | No                                        | No                              |
| 46                             | 1466  | F/B          | 64  | 20.0             | 84                           | 8.8 | 6.7 | Trauma                  | 1341                        | Schizoaffective disorder; ODC            | F/W          | 44  | 24.5             | 106                          | 8.8 | 6.6 | Trauma                            | No            | No              | Atypical                   | No                          | Yes                                       | No                              |
| 47                             | 1518  | M/W          | 50  | 20.7             | 73                           | 7.7 | 6.4 | ASCVD                   | 1367                        | Schizoaffective disorder; ADC; ODR       | M/W          | 47  | 28.9             | 103                          | 7.2 | 6.6 | Combined drug overdose            | No            | No              | None                       | No                          | No                                        | Yes                             |
| 48                             | 1386  | M/W          | 46  | 21.2             | 99                           | 8.3 | 6.7 | ASCVD                   | 1420                        | Schizoaffective disorder; AAR; ODC; OAR  | M/W          | 47  | 23.4             | 92                           | 8.2 | 6.8 | Suicide by jump                   | No            | Yes             | Atypical                   | Yes                         | No                                        | No                              |
| 49                             | 1472  | M/W          | 61  | 23.8             | 84                           | 8.0 | 6.5 | Pulmonary embolism      | 1453                        | Paranoid schizophrenia; ADR              | M/W          | 62  | 11.1             | 87                           | 8.2 | 6.4 | Trauma                            | No            | Yes             | Typical                    | No                          | Yes                                       | No                              |
| 50                             | 1026  | M/W          | 59  | 19.8             | 151                          | 7.4 | 6.3 | ASCVD                   | 1454                        | Paranoid schizophrenia; AAR; ODC         | M/W          | 59  | 24.1             | 86                           | 7.6 | 6.1 | Trauma                            | Yes           | Yes             | Typical                    | Yes                         | No                                        | Yes                             |
| 51                             | 694   | M/W          | 38  | 20.7             | 212                          | 7.7 | 7.0 | Subarachnoid hemorrhage | 1455                        | Paranoid schizophrenia; AAR; OAC         | M/W          | 42  | 8.2              | 86                           | 7.7 | 6.4 | Peritonitis                       | Yes           | Yes             | Atypical                   | No                          | Yes                                       | Yes                             |
| 52                             | 1350  | M/W          | 21  | 24.2             | 105                          | 7.3 | 6.4 | Trauma                  | 1474                        | Schizoaffective disorder; ADR            | M/W          | 37  | 39.9             | 83                           | 7.0 | 6.7 | Suicide by hanging                | No            | No              | None                       | No                          | No                                        | Yes                             |
| 53                             | 1792  | F/W          | 36  | 28.1             | 27                           | 7.5 | 6.5 | Pulmonary embolism      | 1506                        | Schizoaffective disorder; ADC            | F/W          | 47  | 14.1             | 77                           | 7.5 | 6.6 | Combined drug overdose            | No            | Yes             | Both                       | Yes                         | No                                        | Yes                             |
| 54                             | 1524  | M/W          | 66  | 9.4              | 72                           | 8.1 | 6.4 | Intestinal infarction   | 1542                        | Paranoid schizophrenia                   | M/W          | 65  | 17.4             | 69                           | 7.8 | 6.7 | Combined drug overdose            | No            | Yes             | Both                       | Yes                         | Yes                                       | No                              |
| 55                             | 1270  | F/W          | 73  | 19.7             | 119                          | 7.7 | 6.7 | Trauma                  | 1579                        | Schizoaffective disorder; ADR; ODC       | F/W          | 69  | 16.1             | 63                           | 7.7 | 6.7 | ASCVD                             | No            | Yes             | Typical                    | No                          | Yes                                       | Yes                             |
| 56                             | 1372  | M/W          | 37  | 20.5             | 102                          | 9.0 | 6.6 | Asphyxiation            | 1581                        | Paranoid schizophrenia; ODC; OAC         | M/W          | 32  | 18.4             | 62                           | 9.0 | 6.8 | ASCVD                             | No            | Yes             | Atypical                   | Yes                         | No                                        | No                              |
| 57                             | 1543  | F/W          | 45  | 17.9             | 69                           | 7.4 | 6.8 | Subarachnoid hemorrhage | 10026                       | Undifferentiated schizophrenia           | F/W          | 46  | 23.8             | 121                          | 7.6 | 6.6 | Suicide by thermal injuries       | No            | Yes             | Atypical                   | Yes                         | No                                        | No                              |
| 58                             | 1583  | M/W          | 58  | 19.1             | 62                           | 8.2 | 6.8 | Trauma                  | 1686                        | Schizophrenia, paranoid type; AAR        | M/B          | 56  | 14.1             | 45                           | 8.3 | 6.2 | ASCVD                             | No            | Yes             | Both                       | Yes                         | Yes                                       | No                              |
| 59                             | 1554  | M/W          | 50  | 23.2             | 67                           | 7.6 | 6.5 | ASCVD                   | 1691                        | Schizophrenia, paranoid type; ADR; ODC   | M/W          | 51  | 31.9             | 44                           | 7.7 | 6.6 | Combined drug overdose            | Yes           | Yes             | Typical                    | No                          | Yes                                       | No                              |



| Unaffected Comparison Subjects |      |              |      |                  |                              |     |     |                   | Subjects with Schizophrenia |                                                           |              |      |                  |                              |     |     |                |               |                  |                                                             |                             |                                           |                                 |
|--------------------------------|------|--------------|------|------------------|------------------------------|-----|-----|-------------------|-----------------------------|-----------------------------------------------------------|--------------|------|------------------|------------------------------|-----|-----|----------------|---------------|------------------|-------------------------------------------------------------|-----------------------------|-------------------------------------------|---------------------------------|
| Pair                           | Case | Sex/<br>Race | Age  | PMI <sup>a</sup> | Storage<br>Time <sup>b</sup> | RIN | pH  | Cause of Death    | Case                        | DSM IV diagnosis                                          | Sex/<br>Race | Age  | PMI <sup>a</sup> | Storage<br>Time <sup>b</sup> | RIN | pH  | Cause of Death | NSAID<br>ATOD | Tobacco<br>ATOD  | Anti-<br>psychotic<br>ATOD                                  | Anti-<br>depressant<br>ATOD | Benzodiazepine/<br>Anticonvulsant<br>ATOD | Living<br>Independently<br>ATOD |
| 60                             | 1635 | M/W          | 66   | 25.3             | 54                           | 8.2 | 6.8 | Cardiac tamponade | 1706                        | Schizoaffective disorder;<br>AAR; ODC; OAR                | M/B          | 60   | 28.1             | 40                           | 8.4 | 6.8 | Sepsis         | No            | Yes              | Atypical                                                    | No                          | No                                        | No                              |
| 61                             | 1384 | M/W          | 67   | 21.9             | 100                          | 7.0 | 6.6 | ASCVD             | 1712                        | Schizoaffective disorder;<br>ADR; ODC                     | M/W          | 63   | 15.1             | 39                           | 7.1 | 6.2 | ASCVD          | Yes           | No               | Atypical                                                    | Yes                         | Yes                                       | No                              |
| 62                             | 1558 | M/W          | 54   | 24.4             | 67                           | 7.7 | 6.9 | ASCVD             | 1734                        | Schizophrenia,<br>undifferentiated type; AAR;<br>ODC; OAR | M/W          | 54   | 28.6             | 35                           | 7.7 | 6.1 | Pneumonia      | Yes           | Yes              | Typical                                                     | No                          | No                                        | No                              |
|                                | Mean | 48.7         | 18.8 | 145.4            | 8.2                          | 6.7 |     |                   |                             |                                                           |              | 47.7 | 19.2             | 141.7                        | 8.1 | 6.6 |                | 16Y/46N       | 41Y/13N/<br>8Unk | Typical16/<br>Atypical 28/<br>Both8/<br>None9/<br>Unknown 1 | 27Y/35N                     | 24Y/38N                                   | 17Y/45N                         |
|                                | SD   | 13.8         | 5.5  | 56.4             | 0.6                          | 0.2 |     |                   |                             |                                                           |              | 12.7 | 8.5              | 60.9                         | 0.6 | 0.3 |                |               |                  |                                                             |                             |                                           |                                 |

<sup>a</sup> PMI, postmortem interval (hours);

<sup>b</sup> Storage time (months) at -80C;

Other abbreviations: ASCVD, arteriosclerotic cardiovascular disease; MCA, middle cerebral artery; ATOD, at time of death; ADC, alcohol dependence, current at time of death; ADR, alcohol dependence, in remission at time of death; AAC, alcohol abuse, current at time of death; AAR, alcohol abuse, in remission at time of death; ODC, other substance dependence, current at time of death; ODR, other substance dependence, in remission at time of death; OAC, other substance abuse, current at time of death; OAR, other substance abuse, in remission at time of death; U, unknown; M, male; F, female; W, white; B, black.

**Supplemental Table S2: qPCR primer design**

| Gene                                                                        | Species | Accession # | Amplicon Size (bp) | Position  | Forward Primer (F)<br>Reverse Primer (R)               |
|-----------------------------------------------------------------------------|---------|-------------|--------------------|-----------|--------------------------------------------------------|
| Interleukin-1 receptor (IL-1R)                                              | Human   | NM_000877   | 102                | 1789-1890 | (F) GCTTGAGCTGGAGAAAATCC<br>(R) TGTGTAAAGTCCCCTGACCA   |
| Toll-like receptor 4 (TLR4)                                                 | Human   | NM_138554.4 | 58                 | 2073-2130 | (F) AATGGATCAAGGACCAGAGG<br>(R) GTTGACATTCCATTCGTTT    |
| Tumor necrosis factor receptor superfamily member 1A (TNFR)                 | Human   | NM_001065.3 | 117                | 625-741   | (F) GAAATGGGTCAGGTGGAGAT<br>(R) GCAATTGAAGCACTGGAAAA   |
| TNF receptor superfamily member 1B (TNFR2)                                  | Human   | NM_001066.2 | 119                | 631-749   | (F) CCCACCAGATCTGTAACGTG<br>(R) CACTGGCTGGGGTAAGTGTA   |
| TNF receptor superfamily member 5 (CD40)                                    | Human   | NM_001250.  | 64                 | 486-549   | (F) GCAGATTGCTACAGGGGTTT<br>(R) ATTGGAGAAGAAGCCGACTG   |
| TNF receptor superfamily member 3 (lymphotoxin beta receptor; LT $\beta$ R) | Human   | NM_002342.2 | 60                 | 1525-1584 | (F) CTACACCCCACCAGGAAGAT<br>(R) CACCACAGTGCTCTGTCTCC   |
| I $\kappa$ B kinase alpha subunit (IKK $\alpha$ )                           | Human   | NM_001278.3 | 51                 | 1856-1906 | (F) CTCAGGAGCTGTTTGGTCA<br>(R) CTTCTGCTTACAGCCCAACA    |
| IKK $\beta$                                                                 | Human   | NM_001556.2 | 112                | 1570-1681 | (F) AACAGCTGCCTCTCCAAAAT<br>(R) CGCTGTACTTCTCCAGGTCA   |
| NF- $\kappa$ B-inducing kinase (NIK)                                        | Human   | NM_003954.4 | 164                | 2161-2324 | (F) AAGCCAATTACCACCAGACC<br>(R) GCTCAAAGTCAAGGGAGGAG   |
| NF $\kappa$ B inhibitor alpha (I $\kappa$ B $\alpha$ )                      | Human   | NM_020529.2 | 65                 | 949-1013  | (F) TGCCAGAGAGTGAGGATGAG<br>(R) GTCCTCTGTGAACCTCCGTGA  |
| I $\kappa$ B $\beta$                                                        | Human   | NM_002503.4 | 100                | 710-809   | (F) GAAAACACTACGAGGGCCACAC<br>(R) GTTTGTCAAGGTCAGCTCCA |
| I $\kappa$ B $\epsilon$                                                     | Human   | NM_004556.2 | 82                 | 1444-1525 | (F) CCAGGACCTGACTGAGGAAT<br>(R) GTCGGTACACAGCAGCAGTT   |
| RelA                                                                        | Human   | NM_021975.3 | 50                 | 514-563   | (F) ACCTGGAGCAGGCTATCAGT<br>(R) GAAGGGGTTGTTGTTGGTCT   |
| RelB                                                                        | Human   | NM_006509.3 | 81                 | 1048-1128 | (F) GCCGAATTAACAAGGAAAGC<br>(R) TGTCCTCTTTCTGCACCTTG   |
| cRel                                                                        | Human   | NM_002908.3 | 83                 | 1472-1554 | (F) ATGCCTACAGGGGTTTCAAG<br>(R) GAGGCATGATGTGACAATCC   |
| Beta actin                                                                  | Human   | NM_001101   | 101                | 1146-1246 | (F) GATGTGGATCAGCAAGCA<br>(R) AGAAAGGGTGTAAACGCAACTA   |
| Cyclophilin                                                                 | Human   | NM_021130   | 126                | 159-284   | (F) GCAGACAAGGTCCCAAAG<br>(R) GAAGTCACCACCCTGACAAC     |
| Glyceraldehyde-3-phosphate dehydrogenase (GAPDH)                            | Human   | NM_002046   | 87                 | 556-642   | (F) TGCACCACCAACTGCTTAGC<br>(R) GGCATGGACTGTGGTCATGAG  |

| Gene                    | Species        | Accession #    | Amplicon Size (bp) | Position  | Forward Primer (F)<br>Reverse Primer (R)             |
|-------------------------|----------------|----------------|--------------------|-----------|------------------------------------------------------|
| IL-1R                   | Macaca mulatta | XM_001107510   | 102                | 1778-1880 | (F) GCTTGAGCTGGAGAAAATCC<br>(R) TGTGTAAAGTCCCCTGACCA |
| TLR4                    | Macaca mulatta | NM_001037092   | 58                 | 1774-1832 | (F) AGTGGATCAAGGACCAGAGG<br>(R) GTTGCACATTCCATTCGTTT |
| TNFR                    | Macaca mulatta | XM_001118232   | 117                | 165-281   | (F) GAAATGGGCCAGGTGGAGAT<br>(R) GCAATTGAAGCACTGGAAAA |
| TNFR2                   | Macaca mulatta | NM_001266205   | 119                | 624-742   | (F) CCCACCAGATCTGTCCAGTG<br>(R) CACTGGCTGGGGTAAGTGTA |
| CD40                    | Macaca mulatta | NM_001265862   | 64                 | 468-531   | (F) GCAGATTGCTACAGGGGTTT<br>(R) ATTGGAGAAGAAGCCGACCG |
| LT $\beta$ R            | Macaca mulatta | NM_001265736   | 60                 | 1301-1360 | (F) CTACTCCCCACCAGGAAGAT<br>(R) CACCACAGTGCTCTGTCTCC |
| IKK $\alpha$            | Macaca mulatta | XM_001107171   | 51                 | 1888-1938 | (F) CTCAAGGAGCTGTTTGGTCA<br>(R) CTTCTGCTTACAGCCCAACA |
| IKK $\beta$             | Macaca mulatta | NM_001265946   | 112                | 1440-1551 | (F) AACAGCTGCCTCTCCAAGAT<br>(R) CGCTGTACTTCTCCAGGTCA |
| NIK                     | Macaca mulatta | NM_001266698   | 164                | 2140-2303 | (F) AAGCCAATTATCACCAGACC<br>(R) GCTCAAAGTCAAGGGAGGAG |
| I $\kappa$ B $\alpha$   | Macaca mulatta | NM_001257750   | 65                 | 929-993   | (F) TGCCGGAGAGTGAGGATGAG<br>(R) ATCCTCCGTGAAGTCCGTGA |
| I $\kappa$ B $\beta$    | Macaca mulatta | NM_001258157   | 100                | 656-755   | (F) GAAAACTACGAGGGCCACAC<br>(R) GTTTGTCAAGGTCAGTCCA  |
| I $\kappa$ B $\epsilon$ | Macaca mulatta | XM_002808387.1 | 82                 | 1419-1500 | (F) CCAGGACCTCACTGAGGAAT<br>(R) GTCGGTACACAGCAGCAGTT |
| RelA                    | Macaca mulatta | XM_001113258   | 50                 | 638-686   | (F) ACCTGGAGCAGGCTATCACT<br>(R) GAAGGGATTGTTGTTCTGCT |
| RelB                    | Macaca mulatta | XM_001104559   | 81                 | 806-886   | (F) GCCGAATTAACAAGGAAAGC<br>(R) TGTCCTCTTTCTGCACCTTG |
| cRel                    | Macaca mulatta | XM_001115312   | 83                 | 1323-1405 | (F) ATGCCTACAGGGGTTTCAAG<br>(R) GAGGCATGATGTGACAATCC |
| Beta actin              | Macaca mulatta | NM_001033084   | 101                | 1087-1187 | (F) GATGTGGATCAGCAAGCA<br>(R) GAAAGGGTGTAAACGCAACTA  |
| Cyclophilin             | Macaca mulatta | NM_001032809   | 126                | 76-201    | (F) GCAGACAAGGTTCCAAG<br>(R) GAAGTCACCACCCTGACAC     |
| GAPDH                   | Macaca mulatta | XM_001105471   | 93                 | 527-619   | (F) TGCACCACCAACTGCTTAGC<br>(R) AGTGATGGCGTGGACTGTG  |
| IL-1R                   | Mus musculus   | NM_001123382.1 | 115                | 760-874   | (F) ATGAGTTACCCGAGGTCCAG<br>(R) CTGTGCTCTTCAGCCACATT |
| TNFR                    | Mus musculus   | NM_011609.4    | 148                | 568-715   | (F) TACGGCTTCCAGAATTACC<br>(R) CTCACCTCAGGTAGCGTTGGA |

| Gene                  | Species      | Accession #    | Amplicon Size (bp) | Position  | Forward Primer (F)<br>Reverse Primer (R)              |
|-----------------------|--------------|----------------|--------------------|-----------|-------------------------------------------------------|
| LT $\beta$ R          | Mus musculus | NM_010736.3    | 64                 | 747-810   | (F) CAACCCCATACCAGATGTGA<br>(R) CCGAGTAGGAGGTACCTGGA  |
| IKK $\alpha$          | Mus musculus | NM_001162410.1 | 79                 | 1886-1964 | (F) CTCAAGGAGCTGTTTGGTCA<br>(R) CTTCCACCTTGGGGAGTAGA  |
| IKK $\beta$           | Mus musculus | NM_001159774.1 | 51                 | 1808-1858 | (F) CCCTGGATGACCTAGAGGAA<br>(R) CCCTGAGTCTTCGGTAGAGC  |
| NIK                   | Mus musculus | NM_016896.3    | 136                | 1784-1919 | (F) AGAAGTGGTGTATGGGAAAGC<br>(R) GCTGGCAATCTTGAGACAAA |
| I $\kappa$ B $\alpha$ | Mus musculus | NM_010907.2    | 64                 | 932-995   | (F) CAGCTGACCTGGAAAATCT<br>(R) CCGTGTCTATAGCTCTCCTCA  |
| I $\kappa$ B $\beta$  | Mus musculus | NM_010908.4    | 132                | 242- 373  | (F) CGCCCTTAGTCTTTGGCTAC<br>(R) TCTGCAGGTCAAGGTACTCG  |
| RelA                  | Mus musculus | NM_009045.4    | 120                | 597-716   | (F) GCCTCATCCACATGAACTTG<br>(R) CGTTCTTCACACTGGAT     |
| RelB                  | Mus musculus | NM_009046.2    | 52                 | 865-916   | (F) GGAATTGACCCCTACAATG<br>(R) GTCGACCTCCTGATGGTTCT   |
| cRel                  | Mus musculus | NM_009044.2    | 133                | 1238-1370 | (F) GGGATCAACTGGAGAAGGAA<br>(R) GGACCCGCATGAAGAATAGT  |
| Beta actin            | Mus musculus | NM_007393      | 95                 | 955-1049  | (F) CCTCTATGCCAACACAGTGC<br>(R) TGCTAGGAGCCAGAGCAGTA  |
| Cyclophilin           | Mus musculus | NM_008907      | 63                 | 383-445   | (F) CTGCACTGCCAAGACTGAAT<br>(R) CCTTCTTTCACCTTCCCAA   |
| GAPDH                 | Mus musculus | NM_008084      | 64                 | 431-494   | (F) CATGTTTGTGATGGGTGTGA<br>(R) TGCATTGCTGACAATCTTGA  |

**Table S3. Table of poly(I:C)-exposed pregnant mice and outcomes.**

| Gestational Exposure Time Frame | Injection     | Injected Pregnant Mice (n) | Not pregnant or no pups (n) | Mothers that cannibalized pups (n) | Mothers with failure to thrive pups (n) | Mothers with healthy pups (n) | Mean offspring per mother (SD) <sup>a</sup> | Total male offspring studied (n) <sup>b</sup> | Total female offspring studied (n) <sup>b</sup> |
|---------------------------------|---------------|----------------------------|-----------------------------|------------------------------------|-----------------------------------------|-------------------------------|---------------------------------------------|-----------------------------------------------|-------------------------------------------------|
| E11-13                          | Poly(I:C)     | 12                         | 2                           | 1                                  | 2                                       | 7                             | 6.9 (2.0)                                   | 7                                             | 7                                               |
| E11-13                          | Normal Saline | 12                         | 3                           | 0                                  | 1                                       | 8                             | 6.5 (1.1)                                   | 7                                             | 7                                               |
| E15-17                          | Poly(I:C)     | 12                         | 2                           | 0                                  | 0                                       | 10                            | 5.3 (1.8)                                   | 8                                             | 8                                               |
| E15-17                          | Normal Saline | 12                         | 3                           | 1                                  | 0                                       | 8                             | 5.4 (1.7)                                   | 8                                             | 8                                               |

<sup>a</sup> The mean number of offspring per mother with healthy pups did not differ between poly(I:C)-injected mothers and normal saline-injected mothers at E11-13 ( $t_{13}=0.43$ ,  $p=.67$ ) or E15-17 ( $t_{14}=0.15$ ,  $p=.89$ ).

<sup>b</sup> Only one male and/or female offspring per injected mother was included in the study.

**Supplemental Table S4. Effects of maternal immune activation on NF- $\kappa$ B-related mRNA levels in the frontal cortex of male and female adult offspring**

| Immune Marker         | <i>E11-13 Maternal Injections</i> |                   |        | <i>E15-17 Maternal Injections</i> |                   |        |
|-----------------------|-----------------------------------|-------------------|--------|-----------------------------------|-------------------|--------|
|                       | Normal Saline                     | Poly(I:C)         | T test | Normal Saline                     | Poly(I:C)         | T test |
| IL-1R                 |                                   |                   |        |                                   |                   |        |
| <i>Male</i>           | 0.00154 ± 0.00016                 | 0.00150 ± 0.00018 | p=.73  | 0.00158 ± 0.00029                 | 0.00162 ± 0.00031 | p=.79  |
| <i>Female</i>         | 0.00140 ± 0.00023                 | 0.00142 ± 0.00017 | p=.83  | 0.00132 ± 0.00018                 | 0.00133 ± 0.00014 | p=.84  |
| <i>All</i>            | 0.00147 ± 0.00020                 | 0.00146 ± 0.00017 | p=.95  | 0.00145 ± 0.00027                 | 0.00148 ± 0.00028 | p=.77  |
| TNFR                  |                                   |                   |        |                                   |                   |        |
| <i>Male</i>           | 0.00683 ± 0.00071                 | 0.00672 ± 0.00084 | p=.80  | 0.00672 ± 0.00067                 | 0.00680 ± 0.00114 | p=.87  |
| <i>Female</i>         | 0.00682 ± 0.00065                 | 0.00696 ± 0.00047 | p=.65  | 0.00607 ± 0.00074                 | 0.00644 ± 0.00061 | p=.29  |
| <i>All</i>            | 0.00682 ± 0.00065                 | 0.00684 ± 0.00067 | p=.94  | 0.00640 ± 0.00076                 | 0.00662 ± 0.00090 | p=.45  |
| LT $\beta$ R          |                                   |                   |        |                                   |                   |        |
| <i>Male</i>           | 0.00271 ± 0.00037                 | 0.00266 ± 0.00026 | p=.77  | 0.00257 ± 0.00012                 | 0.00258 ± 0.00023 | p=.96  |
| <i>Female</i>         | 0.00263 ± 0.00009                 | 0.00265 ± 0.00017 | p=.83  | 0.00257 ± 0.00023                 | 0.00269 ± 0.00030 | p=.38  |
| <i>All</i>            | 0.00267 ± 0.00026                 | 0.00265 ± 0.00021 | p=.85  | 0.00257 ± 0.00018                 | 0.00263 ± 0.00026 | p=.43  |
| IKK $\alpha$          |                                   |                   |        |                                   |                   |        |
| <i>Male</i>           | 0.0126 ± 0.0031                   | 0.0129 ± 0.0022   | p=.84  | 0.0121 ± 0.0014                   | 0.0125 ± 0.0016   | p=.61  |
| <i>Female</i>         | 0.0125 ± 0.0011                   | 0.0126 ± 0.0016   | p=.91  | 0.0111 ± 0.0016                   | 0.0113 ± 0.0011   | p=.75  |
| <i>All</i>            | 0.0126 ± 0.0023                   | 0.0128 ± 0.0018   | p=.81  | 0.0116 ± 0.0015                   | 0.0119 ± 0.0015   | p=.57  |
| IKK $\beta$           |                                   |                   |        |                                   |                   |        |
| <i>Male</i>           | 0.00932 ± 0.00089                 | 0.00907 ± 0.00088 | p=.61  | 0.00911 ± 0.00085                 | 0.00920 ± 0.00111 | p=.87  |
| <i>Female</i>         | 0.00925 ± 0.00085                 | 0.00925 ± 0.00093 | p=.99  | 0.00888 ± 0.00105                 | 0.00893 ± 0.00075 | p=.92  |
| <i>All</i>            | 0.00928 ± 0.00084                 | 0.00916 ± 0.00088 | p=.71  | 0.00900 ± 0.00093                 | 0.00906 ± 0.00092 | p=.85  |
| NIK                   |                                   |                   |        |                                   |                   |        |
| <i>Male</i>           | 0.00204 ± 0.00023                 | 0.00178 ± 0.00035 | p=.13  | 0.00176 ± 0.00034                 | 0.00161 ± 0.00038 | p=.43  |
| <i>Female</i>         | 0.00151 ± 0.00021                 | 0.00152 ± 0.00039 | p=.94  | 0.00137 ± 0.00041                 | 0.00133 ± 0.00034 | p=.82  |
| <i>All</i>            | 0.00177 ± 0.00035                 | 0.00165 ± 0.00038 | p=.39  | 0.00157 ± 0.00041                 | 0.00147 ± 0.00038 | p=.50  |
| I $\kappa$ B $\alpha$ |                                   |                   |        |                                   |                   |        |
| <i>Male</i>           | 0.01055 ± 0.00104                 | 0.00952 ± 0.00119 | p=.11  | 0.00943 ± 0.00086                 | 0.00929 ± 0.00152 | p=.82  |
| <i>Female</i>         | 0.00812 ± 0.00062                 | 0.00830 ± 0.00080 | p=.65  | 0.00811 ± 0.00096                 | 0.00839 ± 0.00095 | p=.56  |
| <i>All</i>            | 0.00933 ± 0.00151                 | 0.00891 ± 0.00116 | p=.42  | 0.00877 ± 0.00111                 | 0.00884 ± 0.00131 | p=.88  |
| I $\kappa$ B $\beta$  |                                   |                   |        |                                   |                   |        |
| <i>Male</i>           | 0.0185 ± 0.0010                   | 0.0185 ± 0.0008   | p=.91  | 0.0183 ± 0.0009                   | 0.0179 ± 0.0010   | p=.42  |
| <i>Female</i>         | 0.0178 ± 0.0004                   | 0.0177 ± 0.0004   | p=.55  | 0.0169 ± 0.0009                   | 0.0168 ± 0.0006   | p=.91  |
| <i>All</i>            | 0.0182 ± 0.0008                   | 0.0181 ± 0.0007   | p=.90  | 0.0176 ± 0.0011                   | 0.0174 ± 0.0010   | p=.58  |
| RelA                  |                                   |                   |        |                                   |                   |        |
| <i>Male</i>           | 0.00684 ± 0.00041                 | 0.00671 ± 0.00041 | p=.57  | 0.00685 ± 0.00061                 | 0.00669 ± 0.00059 | p=.60  |
| <i>Female</i>         | 0.00610 ± 0.00051                 | 0.00621 ± 0.00056 | p=.72  | 0.00607 ± 0.00075                 | 0.00623 ± 0.00031 | p=.59  |
| <i>All</i>            | 0.00647 ± 0.00059                 | 0.00646 ± 0.00054 | p=.96  | 0.00646 ± 0.00077                 | 0.00646 ± 0.00051 | p=.99  |
| RelB                  |                                   |                   |        |                                   |                   |        |
| <i>Male</i>           | 0.00243 ± 0.00053                 | 0.00239 ± 0.00040 | p=.87  | 0.00233 ± 0.00300                 | 0.00244 ± 0.00057 | p=.64  |
| <i>Female</i>         | 0.00233 ± 0.00050                 | 0.00231 ± 0.00058 | p=.93  | 0.00235 ± 0.00051                 | 0.00227 ± 0.00045 | p=.75  |
| <i>All</i>            | 0.00238 ± 0.00050                 | 0.00235 ± 0.00048 | p=.86  | 0.00234 ± 0.00040                 | 0.00235 ± 0.00051 | p=.93  |

| Immune Marker | <i>E11-13 Maternal Injections</i> |                   |        | <i>E15-17 Maternal Injections</i> |                   |        |
|---------------|-----------------------------------|-------------------|--------|-----------------------------------|-------------------|--------|
|               | Normal Saline                     | Poly(I:C)         | T test | Normal Saline                     | Poly(I:C)         | T test |
| cRel          |                                   |                   |        |                                   |                   |        |
| <i>Male</i>   | 0.00240 ± 0.00020                 | 0.00221 ± 0.00029 | p=.23  | 0.00220 ± 0.00017                 | 0.00215 ± 0.00042 | p=.72  |
| <i>Female</i> | 0.00204 ± 0.00028                 | 0.00205 ± 0.00027 | p=.94  | 0.00196 ± 0.00045                 | 0.00178 ± 0.00021 | p=.35  |
| <i>All</i>    | 0.00222 ± 0.00030                 | 0.00213 ± 0.00028 | p=.45  | 0.00208 ± 0.00035                 | 0.00197 ± 0.00037 | p=.38  |

Values are mean ± standard deviation. Seven male and seven female offspring from the E11-13 maternal injections and eight male and eight female offspring from the E15-17 maternal injections were included in the study.
